# Supplementary material for: Optimal Policies for Security Patch Management
Source: Atypon-hosted journal article supplement (doi:10.1287/ijoc.2014.0638), 2015-07-22
Supplement: ijoc.2014.0638-sm-ec-final.pdf [file ijoc.2014.0638-sm-ec-final.pdf]

*Online Supplement to:*  
**OPTIMAL POLICIES FOR SECURITY PATCH MANAGEMENT**

**Debabrata Dey**

Foster School of Business, University of Washington, Seattle, WA 98195, USA

**Atanu Lahiri**

Jindal School of Management, University of Texas in Dallas, Richardson, TX 75080, USA

**Guoying Zhang**

Dillard College of Business, Midwestern State University, Wichita Falls, TX 76308, USA

---

## Appendix A: Notational Summary

Table A1: A Summary of Important Notations

| Symbol     | Meaning                                                                                                               | Remark                                       |
|------------|-----------------------------------------------------------------------------------------------------------------------|----------------------------------------------|
| $C_d, c_d$ | Disruption cost per patching cycle for unplanned patching                                                             | $c_d = \frac{\lambda C_d}{C_e}$              |
| $C_e$      | Severity level of an unpatched vulnerability; also the exploitation cost per unit time for the vulnerability          | $C_e \sim$ Exponential<br>Mean = $\bar{C}_e$ |
| $C_s, c_s$ | Setup cost per patching cycle                                                                                         | $c_s = \frac{\lambda C_s}{C_e}$              |
| $m$        | Threshold for the patch-based policy                                                                                  |                                              |
| $S_k$      | Cumulative severity of $k$ unpatched vulnerabilities                                                                  |                                              |
| $TC_p$     | Normalized total expected cost per unit time for policy $p$ ,<br>$p \in \{\text{Patch, Time, Total, Emgcy, Hybrid}\}$ |                                              |
| $X, x$     | Threshold for the time-based policy                                                                                   | $x = \lambda X$                              |
| $Y, y$     | Threshold for the total-control policy                                                                                | $y = \frac{Y}{C_e}$                          |
| $Z, z$     | Threshold for the emergency-control policy                                                                            | $z = \frac{Z}{C_e}$                          |
| $\lambda$  | Arrival rate of patches                                                                                               |                                              |
| $\mu$      | Arrival rate of patches with $C_e > Z$                                                                                | $\mu = \lambda e^{-z}$                       |
| $\tau$     | Length of a patching cycle                                                                                            |                                              |

## Appendix B: Proofs

### Proof of Lemma 1

We first derive Equation (1).

$$\begin{aligned}
 & \int_0^\infty dt_m \int_0^{t_m} dt_{m-1} \cdots \int_0^{t_3} dt_2 \int_0^{t_2} dt_1 \lambda^m e^{-\lambda t} \left( \sum_{i=1}^{m-1} \mathbb{E}_{C_e(i)} [(t_m - t_i) C_e(i)] \right) \\
 &= \bar{C}_e \int_0^\infty \lambda^m e^{-\lambda t_m} dt_m \left( (m-1)t_m \left( \int_0^{t_m} dt_{n-1} \cdots \int_0^{t_2} dt_1 \right) - \left( \int_0^{t_m} dt_{n-1} \cdots \int_0^{t_2} dt_1 \sum_{i=1}^{m-1} t_i \right) \right) \\
 &= \bar{C}_e \int_0^\infty \lambda^m e^{-\lambda t_m} dt_m \left( (m-1)t_m \frac{t_m^{m-1}}{(m-1)!} - \frac{t_m^m}{2(m-2)!} \right) \\
 &= \frac{\bar{C}_e m(m-1)}{2\lambda} \int_0^\infty \frac{\lambda^{m+1} t_m^m}{m!} e^{-\lambda t_m} dt_m = \frac{m(m-1)\bar{C}_e}{2\lambda}.
 \end{aligned}$$

The last step follows from the observation that  $\int_0^\infty \frac{\lambda^{m+1} t_m^m}{m!} e^{-\lambda t_m} dt_m = 1$ , since the integrand is an Erlang probability density function.

Therefore, the total expected cost per cycle is  $\left( C_s + C_d + \frac{m(m-1)\bar{C}_e}{2\lambda} \right)$ . Dividing this by the length of the cycle,  $\frac{m}{\lambda}$ , and normalizing with respect to  $\bar{C}_e$ , we get the result. ■

### Proof of Proposition 1

We first relax the constraint that  $m$  is an integer. Because  $\frac{d^2}{dm^2}(TC_{\text{Patch}}) = \frac{2(c_s+c_d)}{m^3} > 0$ , the cost function is convex in  $m$ , and the minimum can be found by simply solving the first order condition:  $\frac{d}{dm}(TC_{\text{Patch}}) = -\frac{c_s+c_d}{m^2} + \frac{1}{2} = 0$ . This results in:  $\tilde{m} = \sqrt{2(c_s + c_d)}$ . If  $\tilde{m}$  is not an integer, the convexity of the cost function implies that the actual integer solution must be in the vicinity of  $\tilde{m}$  and can be found by either rounding it up or down, i.e.,  $m^* = \lceil \tilde{m} \rceil$  or  $m^* = \lfloor \tilde{m} \rfloor + 1$ . Of course,  $m^* = \lfloor \tilde{m} \rfloor$  if  $TC_{\text{Patch}}(\lfloor \tilde{m} \rfloor) < TC_{\text{Patch}}(\lfloor \tilde{m} \rfloor + 1)$ . We can simplify this condition to obtain  $\tilde{m}(1 - 2\alpha) \geq \alpha(1 - \alpha)$ , where  $\alpha = \frac{\tilde{m} - \lfloor \tilde{m} \rfloor}{\tilde{m}}$ . The result follows by putting all of these together. Finally,  $TC_{\text{Patch}}(m^*) \geq TC_{\text{Patch}}(\tilde{m}) = \sqrt{2(c_s + c_d)} - \frac{1}{2}$ . ■

### Proof of Lemma 2

We start with the derivation of Equation (2).

$$\begin{aligned}
 & \sum_{n=1}^\infty \int_0^X dt_n \int_0^{t_n} dt_{n-1} \cdots \int_0^{t_3} dt_2 \int_0^{t_2} dt_1 \lambda^n e^{-\lambda X} \left( \sum_{i=1}^n \mathbb{E}_{C_e(i)} [(X - t_i) C_e(i)] \right) \\
 &= \bar{C}_e \sum_{n=1}^\infty \lambda^n e^{-\lambda X} \left( nX \left( \int_0^X dt_n \int_0^{t_n} dt_{n-1} \cdots \int_0^{t_2} dt_1 \right) - \left( \int_0^X dt_n \int_0^{t_n} dt_{n-1} \cdots \int_0^{t_2} dt_1 \sum_{i=1}^n t_i \right) \right) \\
 &= \bar{C}_e \sum_{n=1}^\infty \lambda^n e^{-x} \left( nX \frac{X^n}{n!} - \frac{X^{n+1}}{2(n-1)!} \right) = \frac{\lambda \bar{C}_e X^2}{2}.
 \end{aligned}$$

The last step follows from the fact that  $\sum_{n=1}^\infty \frac{(\lambda X)^{n-1} e^{-\lambda X}}{(n-1)!}$  is identically equal to one, as it is the sum of all the probability masses from a Poisson distribution.

Now, since there is no disruption cost under this policy, the total expected cost per cycle is simply  $\left( C_s + \frac{\lambda \bar{C}_e X^2}{2} \right)$ . Dividing this by the length of the cycle,  $X$ , and normalizing with respect to  $\bar{C}_e$ , we get the

desired result. ■

## Proof of Proposition 2

The first order condition in this case is  $\frac{d}{dx}(TC_{\text{Time}}) = -\frac{c_s}{x^2} + \frac{1}{2} = 0$ , which can be solved to obtain  $x^* = \sqrt{2c_s}$ . Substituting for  $x^*$ , we get  $TC_{\text{Time}}(x^*) = \sqrt{2c_s}$ . Since  $\frac{d^2}{dx^2}(TC_{\text{Time}}) = \frac{2c_s}{x^3} > 0$ , the second order condition is also satisfied. ■

## Proof of Lemma 3

First, note that:

$$\sum_{i=1}^{n-1} (S_i - S_{i-1})(\sigma - t_i) = \sum_{i=1}^{n-2} S_i(t_{i+1} - t_i) + S_{n-1}(\sigma - t_{n-1}).$$

We will now prove the result by induction. It is, of course, easy to see that the claim is true for  $n = 2$ , since:

$$\Phi_2(\sigma, R) = \int_0^\sigma dt_1 \int_0^R dS_1 (S_1(\sigma - t_1)) = \frac{(\sigma R)^2}{4}.$$

Assuming that the above claim is true for  $n = k - 1$ , we get:

$$\Phi_{k-1}(\sigma, R) = \frac{(\sigma R)^{k-1}}{2(k-1)!(k-3)!}.$$

Also, by definition:

$$\begin{aligned} \Phi_{k-1}(\sigma, R) &= \int_0^\sigma dt_{k-2} \cdots \int_0^{t_2} dt_1 \int_0^R dS_{k-2} \cdots \int_0^{S_2} dS_1 \left( \sum_{i=1}^{k-3} S_i(t_{i+1} - t_i) + S_{k-2}(\sigma - t_{k-2}) \right) \\ &= \int_0^\sigma dt_{k-2} \cdots \int_0^{t_2} dt_1 \int_0^R dS_{k-2} \cdots \int_0^{S_2} dS_1 \left( \sum_{i=1}^{k-3} S_i(t_{i+1} - t_i) \right) \\ &\quad + \int_0^\sigma dt_{k-2} \cdots \int_0^{t_2} dt_1 \int_0^R dS_{k-2} \cdots \int_0^{S_2} dS_1 S_{k-2}(\sigma - t_{k-2}) \\ &= \int_0^\sigma dt_{k-2} \cdots \int_0^{t_2} dt_1 \int_0^R dS_{k-2} \cdots \int_0^{S_2} dS_1 \left( \sum_{i=1}^{k-3} S_i(t_{i+1} - t_i) \right) + \frac{(\sigma R)^{k-1}(k-2)}{(k-1)!(k-1)!}. \end{aligned}$$

Therefore:

$$\begin{aligned} &\int_0^\sigma dt_{k-2} \cdots \int_0^{t_2} dt_1 \int_0^R dS_{k-2} \cdots \int_0^{S_2} dS_1 \left( \sum_{i=1}^{k-3} S_i(t_{i+1} - t_i) \right) \\ &= \frac{(\sigma R)^{k-1}}{2(k-3)!(k-1)!} - \frac{(\sigma R)^{k-1}(k-2)}{(k-1)!(k-1)!} = \frac{(\sigma R)^{k-1}(k-2)(k-3)}{2(k-1)!(k-1)!}. \end{aligned}$$

We can now rewrite  $\Phi_k(\sigma, R)$  as:

$$\Phi_k(\sigma, R) = \int_0^\sigma dt_{k-1} \cdots \int_0^{t_2} dt_1 \int_0^R dS_{k-1} \cdots \int_0^{S_2} dS_1 \left( \sum_{i=1}^{k-3} S_i(t_{i+1} - t_i) + S_{k-2}(t_{k-1} - t_{k-2}) + S_{k-1}(\sigma - t_{k-1}) \right).$$

We now simplify each of the three terms from above:

$$\begin{aligned} & \int_0^\sigma dt_{k-1} \cdots \int_0^{t_2} dt_1 \int_0^R dS_{k-1} \cdots \int_0^{S_2} dS_1 \left( \sum_{i=1}^{k-3} S_i(t_{i+1} - t_i) \right) \\ &= \int_0^\sigma dt_{k-1} \int_0^R dS_{k-1} \frac{(\sigma R)^{k-1} (k-2)(k-3)}{2(k-1)!(k-1)!} = \frac{(\sigma R)^k (k-2)(k-3)}{2k!k!}, \\ & \int_0^\sigma dt_{k-1} \cdots \int_0^{t_2} dt_1 \int_0^R dS_{k-1} \cdots \int_0^{S_2} dS_1 S_{k-2}(t_{k-1} - t_{k-2}) = \frac{(\sigma R)^k (k-2)}{k!k!}, \text{ and} \\ & \int_0^\sigma dt_{k-1} \cdots \int_0^{t_2} dt_1 \int_0^R dS_{k-1} \cdots \int_0^{S_2} dS_1 S_{k-1}(\sigma - t_{k-1}) = \frac{(\sigma R)^k (k-1)}{k!k!}. \end{aligned}$$

Combining them, we obtain:

$$\Phi_k(\sigma, R) = \frac{(\sigma R)^k (k-2)(k-3)}{2k!k!} + \frac{(\sigma R)^k (k-2)}{k!k!} + \frac{(\sigma R)^k (k-1)}{k!k!} = \frac{(\sigma R)^k}{2k!(k-2)!},$$

which proves the induction hypothesis. ■

### Proof of Lemma 4

We first find the expected cycle time  $E[\tau]$ . We first note that:

$$\int_0^{t_n} dt_{n-1} \cdots \int_0^{t_2} dt_1 = \frac{t_n^{n-1}}{(n-1)!} \quad \text{and} \quad \int_0^Y dS_{n-1} \cdots \int_0^{S_2} dS_1 = \frac{Y^{n-1}}{(n-1)!},$$

which can be substituted to obtain:

$$\begin{aligned} E[\tau] &= \sum_{n=1}^{\infty} \int_0^{\infty} dt_n \int_0^{t_n} dt_{n-1} \cdots \int_0^{t_3} dt_2 \int_0^{t_2} dt_1 \int_Y^{\infty} dS_n \int_0^Y dS_{n-1} \cdots \int_0^{S_3} dS_2 \int_0^{S_2} t_n f dS_1 \\ &= \sum_{n=1}^{\infty} \int_0^{\infty} \frac{(\lambda t_n)^n e^{-\lambda t_n}}{(n-1)!} dt_n \int_Y^{\infty} \frac{1}{\bar{C}_e} e^{-\frac{S_n}{\bar{C}_e}} dS_n \times \frac{\left(\frac{Y}{\bar{C}_e}\right)^{n-1}}{(n-1)!} = \sum_{n=1}^{\infty} \frac{\Gamma(n+1)}{\lambda(n-1)!} e^{-y} \frac{y^{n-1}}{(n-1)!}. \end{aligned}$$

Since  $\Gamma(n+1) = n!$ , we can reduce the above to get  $E[\tau] = \frac{y+1}{\lambda}$ .

We now consider the per-cycle expected exploitation cost. The cost arising from the exploitation of patch  $i$  arriving at  $t_i$  is simply  $(t_n - t_i)C_e(i) = (S_i - S_{i-1})(t_n - t_i)$ . Summing this over all possible values of  $i$  and taking expectation over all possible patch arrival patterns, the per-cycle expected exploitation cost can be written as:

$$\begin{aligned} E \left[ \sum_{i=1}^{n-1} (S_i - S_{i-1})(t_n - t_i) \right] &= \sum_{n=2}^{\infty} \int_0^{\infty} dt_n \int_0^{t_n} dt_{n-1} \cdots \int_0^{t_2} dt_1 \int_Y^{\infty} dS_n \int_0^Y dS_{n-1} \cdots \int_0^{S_3} dS_2 \int_0^{S_2} f dS_1 \left( \sum_{i=1}^{n-1} (S_i - S_{i-1})(t_n - t_i) \right) \\ &= \sum_{n=2}^{\infty} \int_0^{\infty} dt_n \int_Y^{\infty} f \Phi_n(t_n, Y) dS_n = \sum_{n=2}^{\infty} \int_0^{\infty} dt_n \int_Y^{\infty} f \frac{(t_n Y)^n}{2n!(n-2)!} dS_n \quad [\text{from Lemma 3}] \\ &= \frac{Y^2}{2\lambda \bar{C}_e} \sum_{n=2}^{\infty} e^{-y} \frac{y^{n-2}}{(n-2)!} = \frac{\bar{C}_e y^2}{2\lambda}. \end{aligned}$$

The last step follows from the observations that  $y = \frac{Y}{\bar{C}_e}$  and the sum is identically equal to 1 as it represents the sum of all the probability masses from a Poisson distribution. Therefore, the total expected cost per cycle is  $\left(C_s + C_d + \frac{\bar{C}_e y^2}{2\lambda}\right)$ . Dividing this by the length of the cycle,  $\frac{y+1}{\lambda}$ , and normalizing with respect to  $\bar{C}_e$ , we get the desired result. ■

### Proof of Proposition 3

The first order condition is:  $\frac{d}{dy}(TC_{\text{Total}}) = \frac{y}{y+1} - \frac{2(c_s+c_d)+y^2}{2(y+1)^2} = 0$ . Since  $y + 1 \neq 0$ , we can multiply both sides by  $2(y+1)^2$  and simplify to obtain  $y^* = \sqrt{1+2(c_s+c_d)} - 1$ . Since  $\frac{d^2}{dy^2}(TC_{\text{Total}}) = \frac{1+2(c_s+c_d)}{(y+1)^3} > 0$ , the second order condition holds as well. In order to obtain the optimal cost, we simply substitute for  $y^*$  to obtain the desired result. ■

### Proof of Lemma 5

To obtain the normalized total cost per unit time, we divide the per-cycle total expected cost with the expected cycle length and normalize it with respect to  $\bar{C}_e$ :

$$TC_{\text{Emgcy}}(Z) = \frac{C_s + C_d + \frac{\lambda \bar{C}_e}{\mu^2}(1 - e^{-z} - ze^{-z})}{\bar{C}_e \frac{1}{\mu}} = \frac{\mu}{\lambda}(c_s + c_d) + \frac{\lambda}{\mu}(1 - e^{-z} - ze^{-z}).$$

The result follows from the fact that  $\mu = \lambda e^{-z}$ . ■

### Proof of Proposition 4

The first order condition is:  $\frac{d}{dz}(TC_{\text{Emgcy}}) = e^z - 1 - e^{-z}(c_s + c_d) = 0$ , which can be solved to obtain  $z^* = \ln\left(\frac{1+\sqrt{1+4(c_s+c_d)}}{2}\right)$ . Since the second order condition— $\frac{d^2}{dz^2}(TC_{\text{Emgcy}}) = e^z + e^{-z}(c_s + c_d) > 0$ —is also satisfied, we simply substitute for  $z^*$  to obtain the cost at optimality. ■

### Proof of Theorem 1

We know that  $TC_{\text{Total}}(y^*) = \sqrt{1+2(c_s+c_d)} - 1$  and  $TC_{\text{Patch}}(m^*) \geq \sqrt{2(c_s+c_d)} - \frac{1}{2}$ . Therefore, the difference between the two can be written as:

$$\Lambda = TC_{\text{Patch}}(m^*) - TC_{\text{Total}}(y^*) \geq \frac{1}{2} + \sqrt{2(c_s+c_d)} - \sqrt{1+2(c_s+c_d)}.$$

If  $c_s + c_d > \frac{9}{32}$ , it can be easily shown that this  $\Lambda > 0$ , implying that the total-control policy performs better. Therefore, to complete the proof, we only need to consider the case where  $c_s + c_d \leq \frac{9}{32}$ . In that case, however,  $m^* = 1$  and  $TC_{\text{Patch}}(m^*) = c_s + c_d$ . As a result,  $\Lambda = 1 + (c_s + c_d) - \sqrt{1+2(c_s+c_d)} = \frac{(c_s+c_d)^2}{1+(c_s+c_d)+\sqrt{1+2(c_s+c_d)}} \geq 0$ .

Similarly when the emergency-control policy is compared to the total-control policy, the cost difference can be written as:

$$\Lambda = TC_{\text{Emgcy}}(z^*) - TC_{\text{Total}}(y^*) = \sqrt{1+4(c_s+c_d)} - \sqrt{1+2(c_s+c_d)} - \ln\left(\frac{1+\sqrt{1+4(c_s+c_d)}}{2}\right).$$

It is easy to see that  $\Lambda = 0$  at  $Q = c_s + c_d = 0$ . Furthermore, for  $Q > 0$ ,

$$\frac{\partial \Lambda}{\partial Q} = \frac{2Q}{\sqrt{1+2Q}(1+\sqrt{1+4Q})} \left( \frac{1}{1+\sqrt{1+2Q}} - \frac{1}{\sqrt{1+2Q} + \sqrt{1+4Q}} \right) > 0.$$

Therefore,  $\Lambda \geq 0$ . ■

## Proof of Theorem 2

We know that  $TC_{\text{Time}}(x^*) = \sqrt{2c_s}$  and  $TC_{\text{Total}}(y^*) = \sqrt{1 + 2(c_s + c_d)} - 1$ . Clearly, time-based policy would perform better if  $TC_{\text{Time}}(x^*) < TC_{\text{Total}}(y^*)$ . However, since the costs are non-negative, this is equivalent to  $(TC_{\text{Time}}(x^*) + 1)^2 < (TC_{\text{Total}}(y^*) + 1)^2$ . Simplifying, we obtain  $c_d > \sqrt{2c_s}$ . ■

## Proof of Lemma 6

Since  $H_1(a, x) = \sum_{n=0}^{\infty} \frac{x^n}{n!(n+a-1)!}$ , we get:

$$H_{1x}(a, x) = \frac{\partial H_1(a, x)}{\partial x} = \sum_{n=1}^{\infty} \frac{nx^{n-1}}{n!(n+a-1)!} = \sum_{k=0}^{\infty} \frac{x^k}{k!(k+(a+1)-1)!} = H_1(a+1, x).$$

Also,  $H_2(a, b, x, y) = \sum_{n=b+1}^{\infty} \frac{e^{-y}y^{n-b-1}\Gamma(n+a,x)}{(n-1)!(n-b-1)!}$ . First we note that  $\frac{\partial \Gamma(n+a,x)}{\partial x} = -e^{-x}x^{n+a-1}$ . Therefore:

$$\begin{aligned} H_{2x}(a, b, x, y) &= \frac{\partial H_2(a, b, x, y)}{\partial x} = -\sum_{n=b+1}^{\infty} \frac{e^{-y}y^{n-b-1}e^{-x}x^{n+a-1}}{(n-1)!(n-b-1)!} = -e^{-(x+y)}x^{a+b} \sum_{n=b+1}^{\infty} \frac{(xy)^{n-b-1}}{(n-1)!(n-b-1)!} \\ &= -e^{-(x+y)}x^{a+b} \sum_{k=0}^{\infty} \frac{(xy)^k}{k!(k+(b+1)-1)!} = -e^{-(x+y)}x^{a+b}H_1(b+1, xy). \end{aligned}$$

Finally:

$$\begin{aligned} H_{2y}(a, b, x, y) &= \frac{\partial H_2(a, b, x, y)}{\partial y} = \sum_{n=b+1}^{\infty} \frac{e^{-y}y^{n-b-1}\Gamma(n+a,x)}{(n-1)!(n-b-1)!} \\ &= \sum_{n=b+2}^{\infty} \frac{e^{-y}y^{n-b-2}\Gamma(n+a,x)}{(n-1)!(n-b-2)!} - \sum_{n=b+1}^{\infty} \frac{e^{-y}y^{n-b-1}\Gamma(n+a,x)}{(n-1)!(n-b-1)!} \\ &= H_2(a, b+1, x, y) - H_2(a, b, x, y), \end{aligned}$$

which completes the proof. ■

## Proof of Lemma 7

We first consider the expected cycle time:

$$\begin{aligned} E[\tau] &= \sum_{n=1}^{\infty} \int_X^{\infty} dt_n \int_0^X dt_{n-1} \cdots \int_0^{t_3} dt_2 \int_0^{t_2} dt_1 \int_0^{\infty} dS_n \int_0^{\min\{Y, S_n\}} dS_{n-1} \cdots \int_0^{S_3} dS_2 \int_0^{S_2} X f dS_1 \\ &\quad + \sum_{n=1}^{\infty} \int_0^X dt_n \int_0^{t_n} dt_{n-1} \cdots \int_0^{t_3} dt_2 \int_0^{t_2} dt_1 \int_Y^{\infty} dS_n \int_0^Y dS_{n-1} \cdots \int_0^{S_3} dS_2 \int_0^{S_2} t_n f dS_1. \end{aligned}$$

The first term in the expression above can be written as:

$$\begin{aligned}
 & \sum_{n=1}^{\infty} \int_X^{\infty} dt_n \int_0^X dt_{n-1} \cdots \int_0^{t_3} dt_2 \int_0^{t_2} dt_1 \int_0^{\min\{Y, S_n\}} dS_n \int_0^{S_n} dS_{n-1} \cdots \int_0^{S_3} dS_2 \int_0^{S_2} X f dS_1 \\
 &= \sum_{n=1}^{\infty} \int_X^{\infty} dt_n \int_0^X dt_{n-1} \cdots \int_0^{t_3} dt_2 \int_0^{t_2} dt_1 \int_0^Y dS_n \int_0^{S_n} dS_{n-1} \cdots \int_0^{S_3} dS_2 \int_0^{S_2} X f dS_1 \\
 &+ \sum_{n=1}^{\infty} \int_X^{\infty} dt_n \int_0^X dt_{n-1} \cdots \int_0^{t_3} dt_2 \int_0^{t_2} dt_1 \int_Y^{\infty} dS_n \int_0^Y dS_{n-1} \cdots \int_0^{S_3} dS_2 \int_0^{S_2} X f dS_1 \\
 &= \sum_{n=1}^{\infty} \int_X^{\infty} dt_n \frac{X^n}{(n-1)!} \int_0^Y f dS_n \frac{S_n^{n-1}}{(n-1)!} + \sum_{n=1}^{\infty} \int_X^{\infty} dt_n \frac{X^n}{(n-1)!} \int_Y^{\infty} f dS_n \frac{Y^{n-1}}{(n-1)!} \\
 &= \sum_{n=1}^{\infty} \frac{e^{-x} x^n ((n-1)! + e^{-y} y^{n-1} - \Gamma(n, y))}{\lambda(n-1)!(n-1)!},
 \end{aligned}$$

where, as before,  $y = \frac{Y}{C_e}$  and  $x = \lambda X$ . Moving on to the second term in the expression for  $E[\tau]$ , we get:

$$\begin{aligned}
 & \sum_{n=1}^{\infty} \int_0^X dt_n \int_0^{t_n} dt_{n-1} \cdots \int_0^{t_3} dt_2 \int_0^{t_2} dt_1 \int_Y^{\infty} dS_n \int_0^Y dS_{n-1} \cdots \int_0^{S_3} dS_2 \int_0^{S_2} t_n f dS_1 \\
 &= \sum_{n=1}^{\infty} \int_0^X dt_n \frac{t_n^n}{(n-1)!} \int_Y^{\infty} f dS_n \frac{Y^{n-1}}{(n-1)!} = \sum_{n=1}^{\infty} \frac{e^{-y} y^{n-1} (n! - \Gamma(n+1, x))}{\lambda(n-1)!(n-1)!}.
 \end{aligned}$$

Combining, we get:

$$\begin{aligned}
 E[\tau] &= \sum_{n=1}^{\infty} \left( \frac{e^{-x} x^n ((n-1)! + e^{-y} y^{n-1} - \Gamma(n, y))}{\lambda(n-1)!(n-1)!} + \frac{e^{-y} y^{n-1} (n! - \Gamma(n+1, x))}{\lambda(n-1)!(n-1)!} \right) \\
 &= \frac{1}{\lambda} \left( x + y + 1 + e^{-(x+y)} x H_1(1, xy) - x H_2(0, 0, y, x) - H_2(1, 0, x, y) \right),
 \end{aligned}$$

where  $H_1(a, x)$  and  $H_2(a, b, x, y)$  are as defined in (4).

We now consider the per-cycle expected exploitation cost. The cost arising from the exploitation of patch  $i$  arriving at  $t_i < \tau$  is simply  $(\tau - t_i)C_e(i) = (S_i - S_{i-1})(\tau - t_i)$ . Summing this over  $i$  and taking expectation over all possible patch arrival patterns, the per-cycle expected exploitation cost can be written as:

$$\begin{aligned}
 & E \left[ \sum_{i=1}^{n-1} (S_i - S_{i-1})(\tau - t_i) \right] \\
 &= \sum_{n=2}^{\infty} \int_X^{\infty} dt_n \int_0^X dt_{n-1} \cdots \int_0^{t_3} dt_2 \int_0^{t_2} dt_1 \int_0^{\min\{Y, S_n\}} dS_n \int_0^{S_n} dS_{n-1} \cdots \int_0^{S_3} dS_2 \int_0^{S_2} f dS_1 \left( \sum_{i=1}^{n-1} (S_i - S_{i-1})(X - t_i) \right) \\
 &+ \sum_{n=2}^{\infty} \int_0^X dt_n \int_0^{t_n} dt_{n-1} \cdots \int_0^{t_3} dt_2 \int_0^{t_2} dt_1 \int_Y^{\infty} dS_n \int_0^Y dS_{n-1} \cdots \int_0^{S_3} dS_2 \int_0^{S_2} f dS_1 \left( \sum_{i=1}^{n-1} (S_i - S_{i-1})(t_n - t_i) \right).
 \end{aligned}$$

We can simplify the first term as:

$$\begin{aligned}
 & \sum_{n=2}^{\infty} \int_0^{\infty} dt_n \int_0^X dt_{n-1} \cdots \int_0^{t_3} dt_2 \int_0^{t_2} dt_1 \int_0^{\min\{Y, S_n\}} dS_n \int_0^{S_n} dS_{n-1} \cdots \int_0^{S_3} dS_2 \int_0^{S_2} f dS_1 \left( \sum_{i=1}^{n-1} (S_i - S_{i-1})(X - t_i) \right) \\
 &= \sum_{n=2}^{\infty} \int_0^{\infty} dt_n \int_0^X dt_{n-1} \cdots \int_0^{t_3} dt_2 \int_0^{t_2} dt_1 \int_0^Y dS_n \int_0^{S_n} dS_{n-1} \cdots \int_0^{S_3} dS_2 \int_0^{S_2} f dS_1 \left( \sum_{i=1}^{n-1} (S_i - S_{i-1})(X - t_i) \right) \\
 &\quad + \sum_{n=2}^{\infty} \int_0^{\infty} dt_n \int_0^X dt_{n-1} \cdots \int_0^{t_3} dt_2 \int_0^{t_2} dt_1 \int_Y^{\infty} dS_n \int_0^{S_n} dS_{n-1} \cdots \int_0^{S_3} dS_2 \int_0^{S_2} f dS_1 \left( \sum_{i=1}^{n-1} (S_i - S_{i-1})(X - t_i) \right) \\
 &= \sum_{n=2}^{\infty} \int_0^{\infty} dt_n \int_0^Y dS_n \Phi_n(X, S_n) f + \sum_{n=2}^{\infty} \int_0^{\infty} dt_n \int_Y^{\infty} dS_n \Phi_n(X, Y) f \\
 &= \sum_{n=2}^{\infty} \int_0^{\infty} dt_n \int_0^Y dS_n \frac{(XS_n)^n}{2n!(n-2)!} f + \sum_{n=2}^{\infty} \int_0^{\infty} dt_n \int_Y^{\infty} dS_n \frac{(XY)^n}{2n!(n-2)!} f \quad [\text{from Lemma 3}] \\
 &= \sum_{n=2}^{\infty} \frac{\bar{C}_e e^{-x} x^n (n! + e^{-y} y^n - \Gamma(n+1, y))}{2\lambda(n-2)!n!}.
 \end{aligned}$$

We now consider the second term:

$$\begin{aligned}
 & \sum_{n=2}^{\infty} \int_0^X dt_n \int_0^{t_n} dt_{n-1} \cdots \int_0^{t_3} dt_2 \int_0^{t_2} dt_1 \int_Y^{\infty} dS_n \int_0^{S_n} dS_{n-1} \cdots \int_0^{S_3} dS_2 \int_0^{S_2} f dS_1 \left( \sum_{i=1}^{n-1} (S_i - S_{i-1})(t_n - t_i) \right) \\
 &= \sum_{n=2}^{\infty} \int_0^X dt_n \int_Y^{\infty} dS_n \Phi_n(t_n, Y) f = \sum_{n=2}^{\infty} \int_0^X dt_n \int_Y^{\infty} dS_n \frac{(t_n Y)^n}{2n!(n-2)!} f \quad [\text{from Lemma 3}] \\
 &= \sum_{n=2}^{\infty} \frac{\bar{C}_e e^{-y} y^n (n! - \Gamma(n+1, x))}{2\lambda(n-2)!n!} = \frac{\bar{C}_e y^2}{2\lambda} - \sum_{n=2}^{\infty} \frac{\bar{C}_e e^{-y} y^n \Gamma(n+1, x)}{2\lambda(n-2)!n!}.
 \end{aligned}$$

Combining, the expected per-cycle exploitation cost can be expressed as:

$$\begin{aligned}
 \mathbb{E} \left[ \sum_{i=1}^{n-1} (S_i - S_{i-1})(\tau - t_i) \right] &= \frac{\bar{C}_e y^2}{2\lambda} + \sum_{n=2}^{\infty} \frac{\bar{C}_e (e^{-x} x^n (n! + e^{-y} y^n - \Gamma(n+1, y)) - e^{-y} y^n \Gamma(n+1, x))}{2\lambda n!(n-2)!} \\
 &= \frac{\bar{C}_e}{2\lambda} \left( x^2 (1 - H_2(0, 2, y, x)) + y^2 (1 - H_2(0, 2, x, y)) + e^{-(x+y)} x^2 y^2 H_1(3, xy) \right).
 \end{aligned}$$

Finally, we consider the probability that a patching cycle ends as a result of the severity trigger:

$$\begin{aligned}
 \Pr[\tau < X] &= \sum_{n=1}^{\infty} \int_0^X dt_n \int_0^{t_n} dt_{n-1} \cdots \int_0^{t_3} dt_2 \int_0^{t_2} dt_1 \int_Y^{\infty} dS_n \int_0^{S_n} dS_{n-1} \cdots \int_0^{S_3} dS_2 \int_0^{S_2} f dS_1 \\
 &= \sum_{n=1}^{\infty} \int_0^X dt_n \frac{t_n^{n-1}}{(n-1)!} \int_Y^{\infty} dS_n \frac{Y^{n-1}}{(n-1)!} f = \sum_{n=1}^{\infty} \frac{e^{-y} y^{n-1} ((n-1)! - \Gamma(n, x))}{(n-1)!(n-1)!} \\
 &= 1 - \sum_{n=1}^{\infty} \frac{e^{-y} y^{n-1} \Gamma(n, x)}{(n-1)!(n-1)!} = 1 - H_2(0, 0, x, y).
 \end{aligned}$$

The total expected cost per cycle is  $\mathbb{E} \left[ \sum_{i=1}^{n-1} (S_i - S_{i-1})(\tau - t_i) \right] + (C_s + \Pr[\tau < X] C_d)$ , dividing which

by the length of the cycle,  $E[\tau]$ , and normalizing with respect to  $\bar{C}_e$ , we get the desired result. ■

### Proof of Proposition 5

We first show that (5) represents the first order conditions for this optimization problem. Since Lemma 6 ensures that  $\frac{\partial N}{\partial x}$  and  $\frac{\partial D}{\partial x}$  exists, the first order condition with respect to  $x$  can be written as:

$$\frac{\partial TC_{\text{Hybrid}}(x, y)}{\partial x} = \frac{1}{D^2} \left( D \frac{\partial N}{\partial x} - N \frac{\partial D}{\partial x} \right) = 0.$$

Since  $N, D > 0$ , we can multiply both sides by  $\frac{D^2}{N}$  and rewrite the first order condition as:

$$\frac{1}{N} \frac{\partial N}{\partial x} - \frac{1}{D} \frac{\partial D}{\partial x} = 0 \quad \Rightarrow \quad \frac{\partial \ln N}{\partial x} - \frac{\partial \ln D}{\partial x} = 0.$$

The first order condition with respect to  $y$  follows in an analogous manner. Since  $(x_H^*, y_H^*)$  satisfies the first order conditions in (5), the optimal solution is obtained at that point. ■

### Proof of Theorem 3

Let  $\psi = \Pr[\tau < X]$ ,  $\psi' = 1 - \psi$ , and  $\theta = \lambda E[\tau]$ . Then, for a hybrid policy,

$$\frac{\partial^2 (TC_{\text{Hybrid}})}{\partial c_d \partial y} = \frac{\partial}{\partial y} \left( \frac{\partial (TC_{\text{Hybrid}})}{\partial c_d} \right) = \frac{\partial \left( \frac{\psi}{\theta} \right)}{\partial y} < 0, \quad (\text{B1})$$

because, trivially,  $\psi$  is decreasing in  $y$  and  $\theta$  is increasing. Similarly,

$$\frac{\partial^2 (TC_{\text{Hybrid}})}{\partial c_d \partial x} = \frac{\partial}{\partial x} \left( \frac{\partial (TC_{\text{Hybrid}})}{\partial c_d} \right) = \frac{\partial \left( \frac{\psi}{\theta} \right)}{\partial x} = \frac{\partial \left( \frac{1}{\theta} \right)}{\partial x} - \frac{\partial \left( \frac{\psi'}{\theta} \right)}{\partial x} > 0. \quad (\text{B2})$$

This is because  $\theta$  is increasing in  $x$  and  $\psi'$  is decreasing, which together mean that  $\frac{1}{\theta}$  declines less rapidly than does  $\frac{\psi'}{\theta}$ .

Now, we apply the implicit function theorem. Since  $(x_H^*, y_H^*)$  is a minimum obtained from

$$\frac{\partial (TC_{\text{Hybrid}})}{\partial x} = \frac{\partial (TC_{\text{Hybrid}})}{\partial y} = 0,$$

from the implicit function theorem, it is clear that the first order reactions to changing  $c_d$  would be exactly the opposite of the cross-partials above; so,  $x_H^*$  would be reduced, and  $y_H^*$  increased. However, since  $x_H$  and  $y_H$  are strategic substitutes when it comes to trading off the exploitation cost with the setup cost, the second order effects—the effect of reducing  $x_H$  on  $y_H$  and that of increasing  $y_H$  on  $x_H$ —would further reinforce the first order effects. Hence, the signs of  $\frac{dx_H^*}{dc_d}$  and  $\frac{dy_H^*}{dc_d}$  should be exactly the opposites of the signs of  $\frac{\partial^2 (TC_{\text{Hybrid}})}{\partial c_d \partial x}$  and  $\frac{\partial^2 (TC_{\text{Hybrid}})}{\partial c_d \partial y}$ , respectively. It thus follows from (B1) and (B2) that  $x_H^*$  is monotonically decreasing in  $c_d$ , while  $y_H^*$  is increasing. (Such monotonicity is also expected, since a higher  $c_d$  means disruptions are more costly, which, in turn, implies that time-based triggers are relatively more appealing while severity-based triggers are less so.)

It is easy to see that, when  $c_d \rightarrow \infty$ , in optimality, the hybrid policy degenerates to the time-based policy, implying  $x_H^* = x^*$ . At the other extreme, when  $c_d = 0$ , it degenerates to the total-control policy, so  $x_H^* \rightarrow \infty$ . It then follows from the monotonicity shown above that  $x_H^* \geq x^*$ . Since an analogous argument applies to  $y_H^*$ ,  $y_H^* \geq y^*$ . ■
